# Supplementary material
Source: PubMed Central journal article supplement (PMC7094500)

## Appendix

The concentration (ng g<sup>-1</sup>) of each PAH in the sediment along the depth gradient (cm).

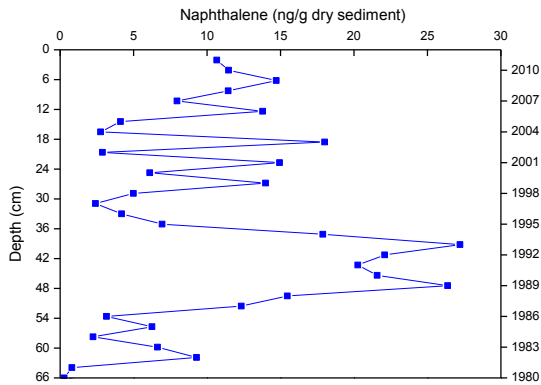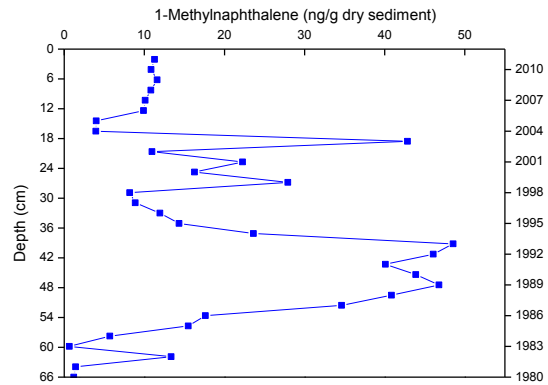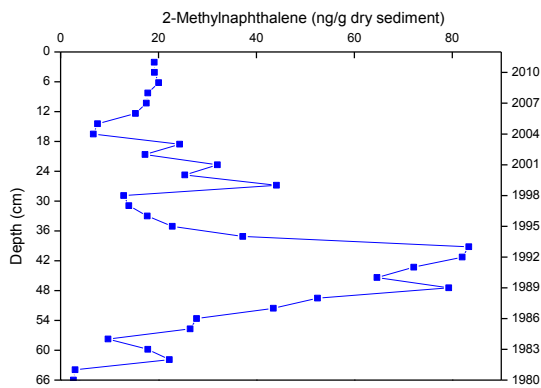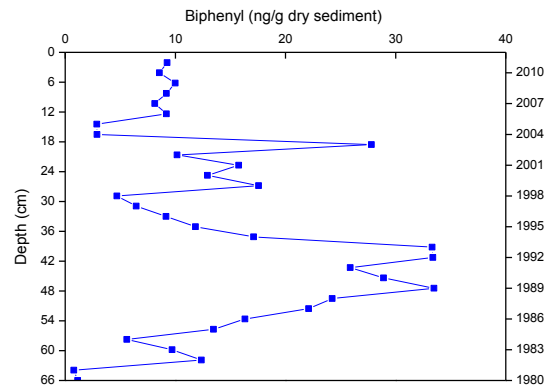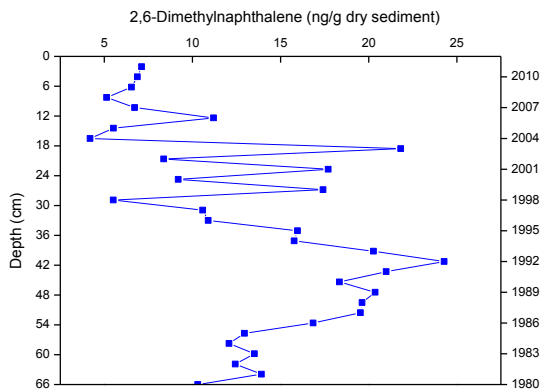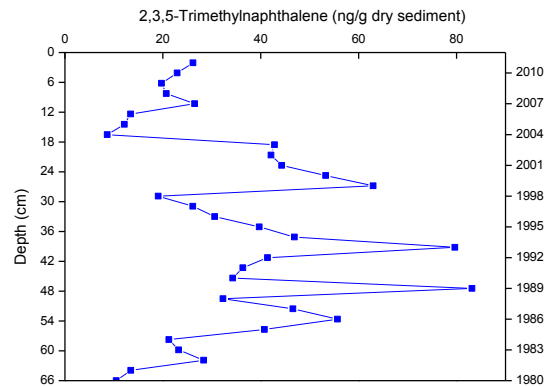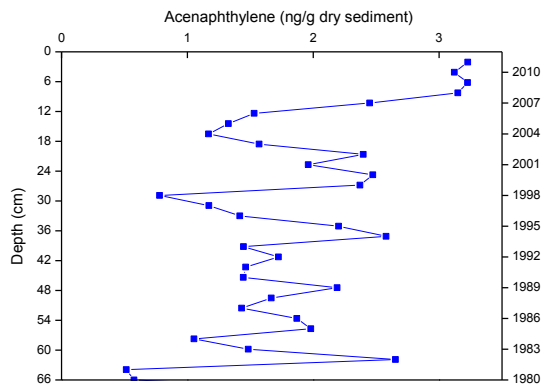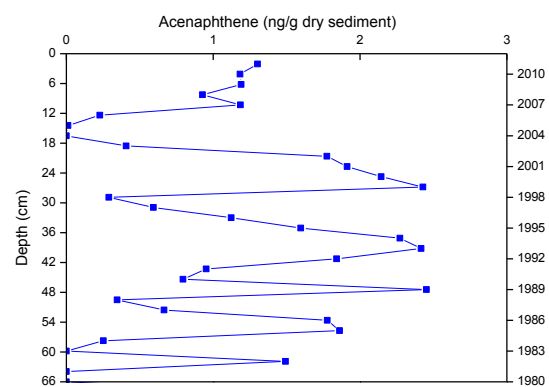

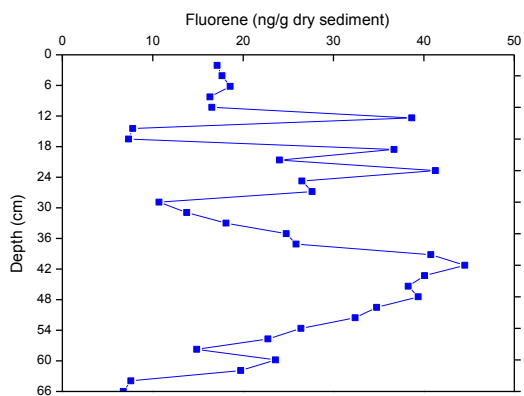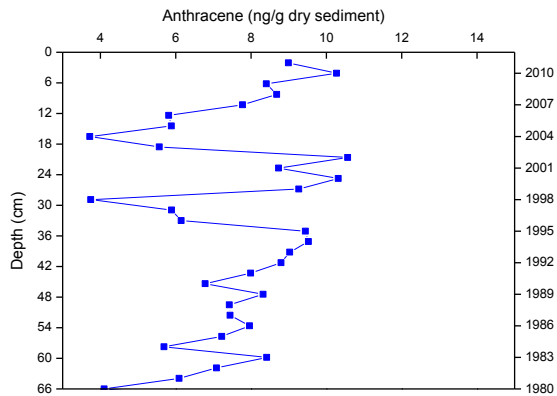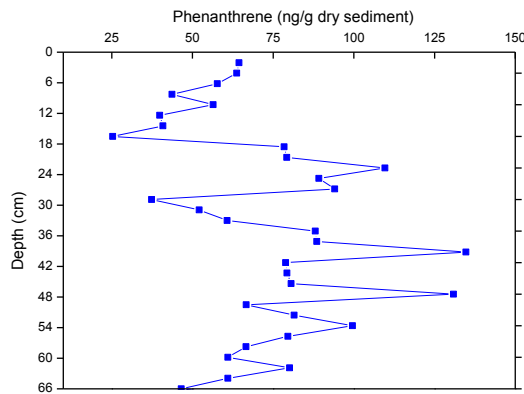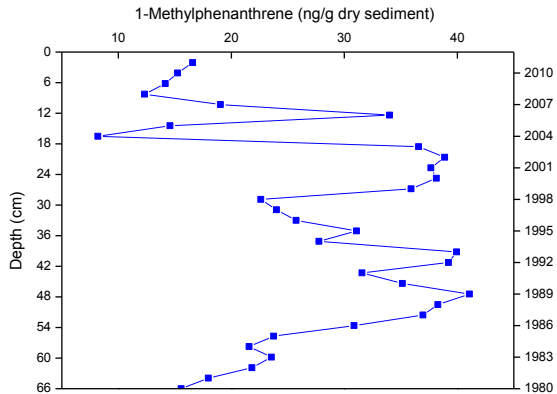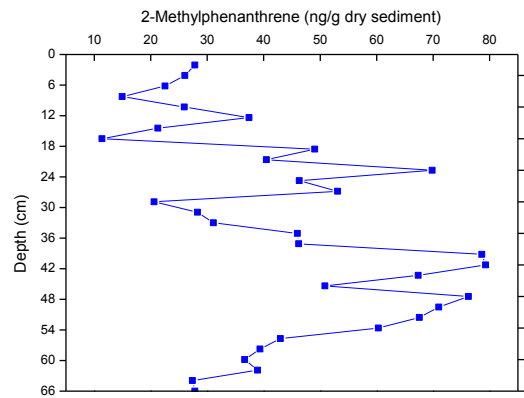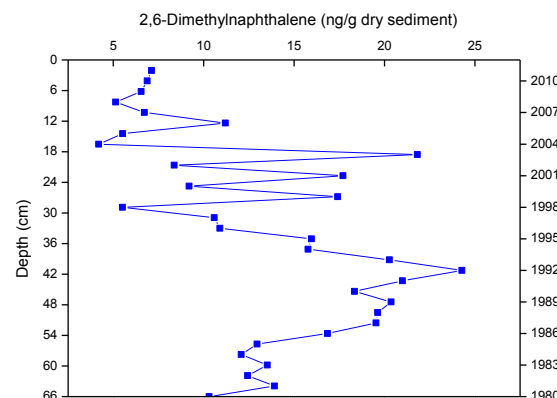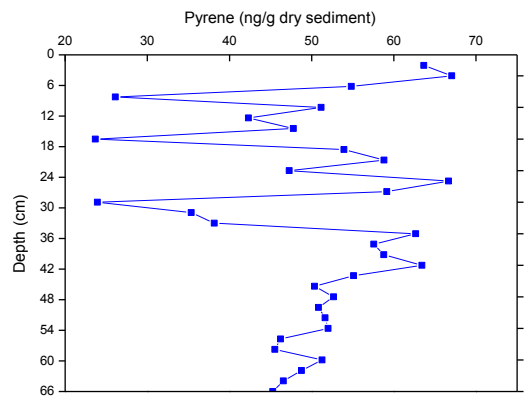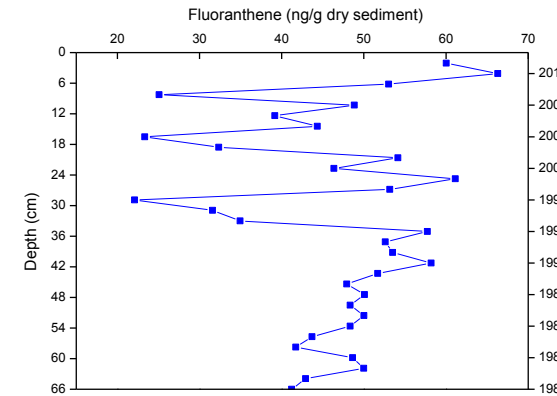

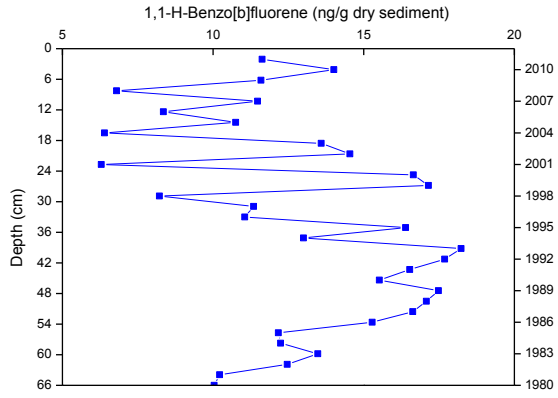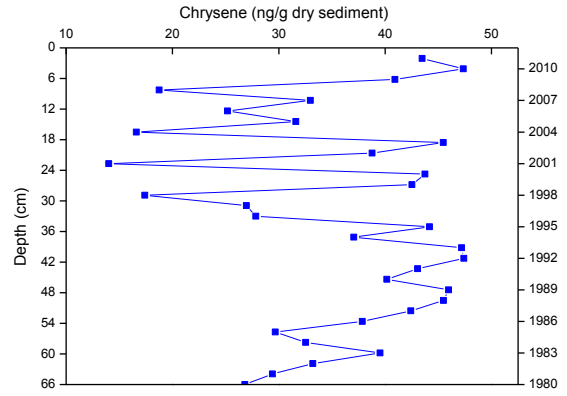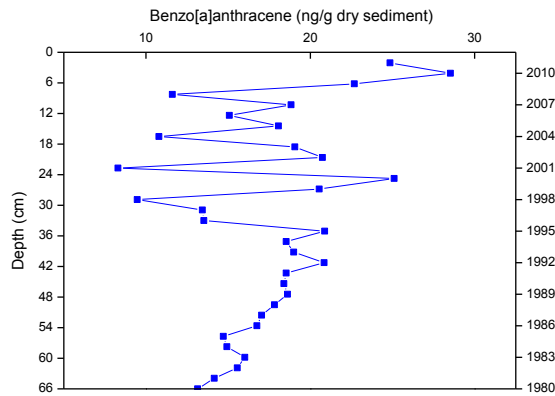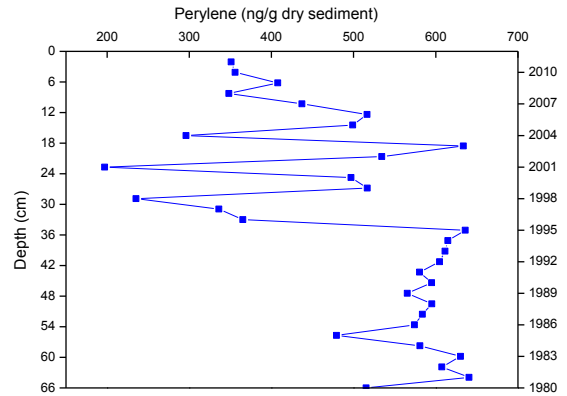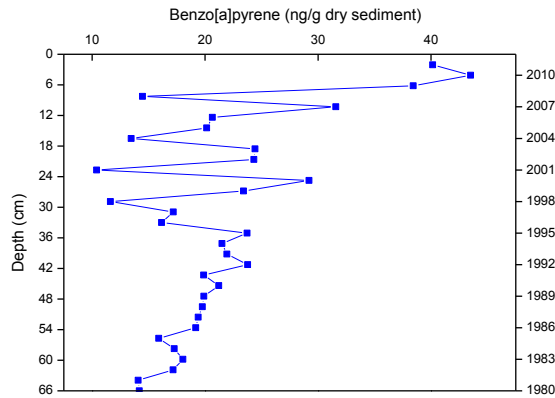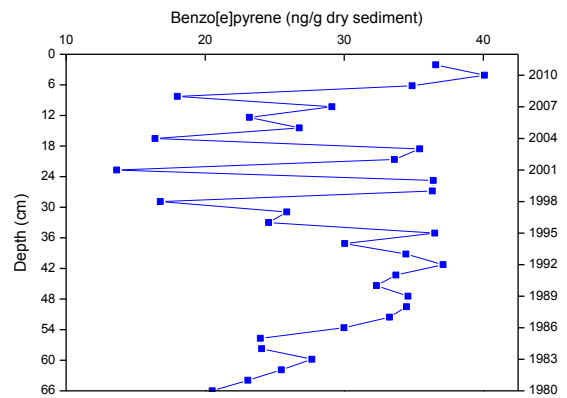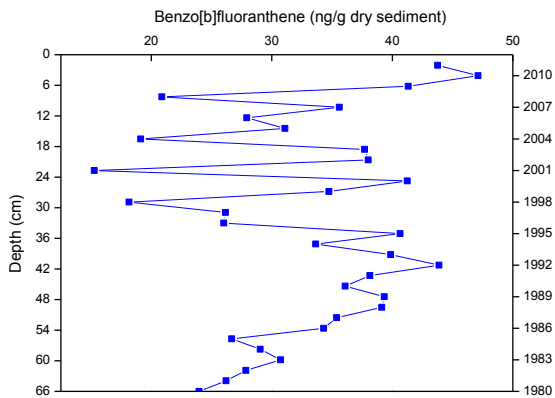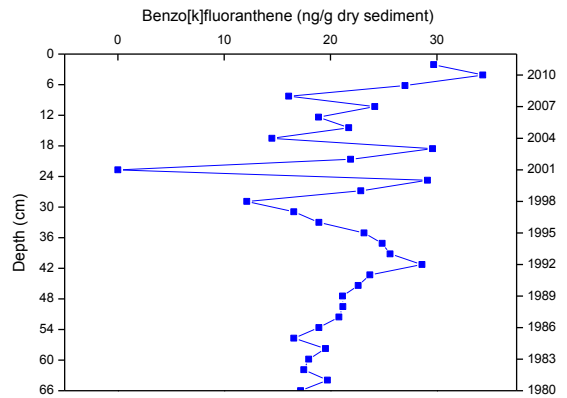

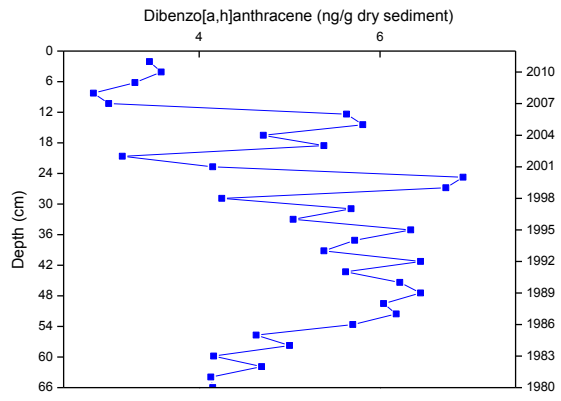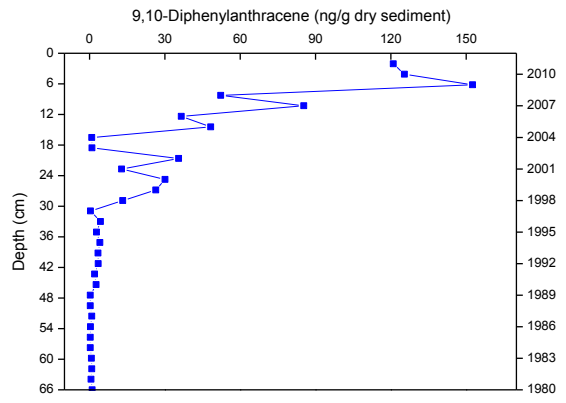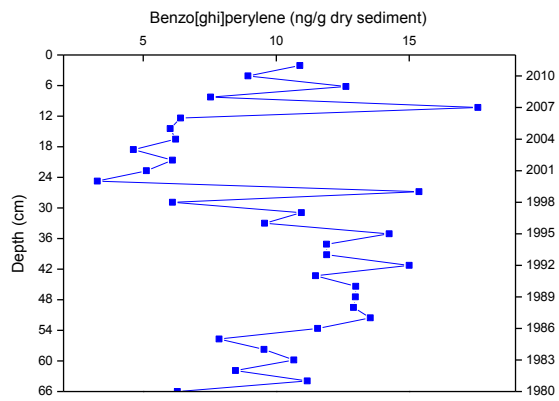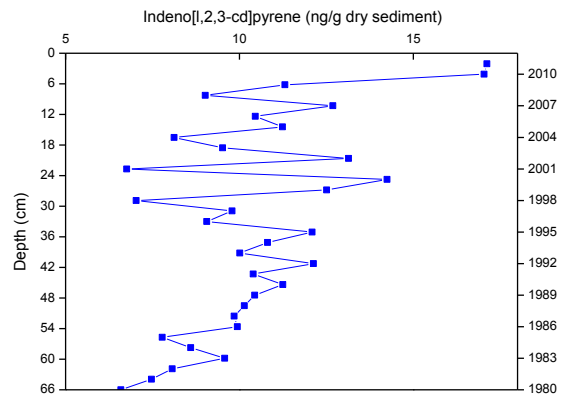

Supplement: mmc1.pdf [file mmc1.pdf]
